# Supplementary material for: The SPOC domain is a phosphoserine binding module that bridges transcription machinery with co- and post-transcriptional regulators
Source: PubMed Central journal article supplement (PMC9834408; doi:10.1038/s41467-023-35853-1), 2023-01-11
Supplement: 41467_2023_35853_MOESM3_ESM.pdf [file 41467_2023_35853_MOESM3_ESM.pdf]

## Description of Additional Supplementary Files

File Name: Supplementary Data 1

Description: Mass spectrometry analysis of the interactome of DIDO, PHF3, RBM15 and SHARP SPOC domains in HEK293T cells.

File Name: Supplementary Data 2

Description: Mass spectrometry analysis of the interactome of full length SHARP and SHARP  $\Delta$ SPOC in HEK293T cells.

File Name: Supplementary Data 3

Description: RNA-seq analysis in DIDO  $\Delta$ SPOC, DIDO KO, DIDO WT, RBM15  $\Delta$ SPOC, RBM15 KO, RBM15 WT, SHARP  $\Delta$ SPOC, SHARP WT, PHF3  $\Delta$ SPOC, PHF3 KO and PHF3 WT HEK293T cells.

File Name: Supplementary Data 4

Description: TT-seq analysis in DIDO  $\Delta$ SPOC, DIDO KO, DIDO WT, RBM15  $\Delta$ SPOC, RBM15 KO, RBM15 WT, SHARP  $\Delta$ SPOC, SHARP WT, PHF3  $\Delta$ SPOC, PHF3 KO and PHF3 WT HEK293T cells.

File Name: Supplementary Data 5

Description: ChIP-seq analysis.

File Name: Supplementary Data 6

Description: Optimized parameters for each compound analysed in the mass spectrometry analysis of hydrolysed nucleosides.
